# Supplementary material
Source: MDPI journal article supplement (https://www.mdpi.com/2673-8023/2/2/16)
Supplement: s1 [file s1 › micro-1665270-supplementary.pdf]

## Supplementary Materials

### Preparation of Non-Toxic Fluorescent Peptide-Coated Silica/PEG Nanoparticles from Peptide-Block Copolymer Conjugates

Federica Santino <sup>1,#</sup>, Pasquale Stavole <sup>1,#</sup>, Tingting He <sup>1</sup>, Silvia Pieraccini <sup>1</sup>, Mayra Paolillo <sup>2</sup>, Luca Prodi <sup>1</sup>, Enrico Rampazzo <sup>1,\*</sup>, and Luca Gentilucci <sup>1,\*</sup>

<sup>1</sup> Department of Chemistry “G. Ciamician”, University of Bologna, via Selmi 2, 40126-Bologna Italy

<sup>2</sup> Department of Drugs Sciences, University of Pavia, 27100 Pavia, Italy

\* L.G. E-mail: [luca.gentilucci@unibo.it](mailto:luca.gentilucci@unibo.it); Tel.: +39 0512099570; Fax: 39 0512099456;

web: <https://site.unibo.it/mimepept/en>

E.R. E-mail: [enrico.rampazzo@unibo.it](mailto:enrico.rampazzo@unibo.it); Tel.: +39 0512099596

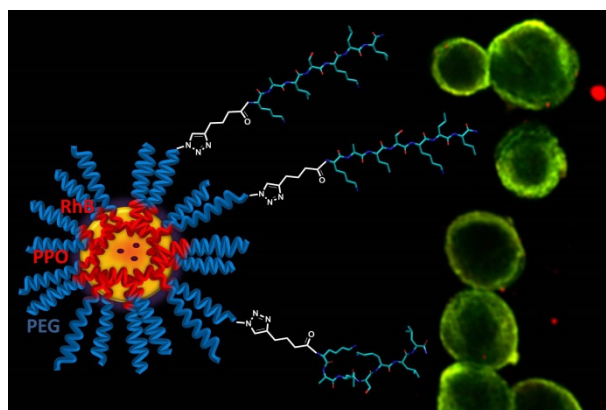

## Contents

|                                                                                                |     |
|------------------------------------------------------------------------------------------------|-----|
| Figure S1-S3. RP HPLC and ESI MS of the peptides .....                                         | pS2 |
| Figure S4. CD spectra of peptide <sup>2+</sup> .....                                           | pS3 |
| Figure S5-S6. <sup>1</sup> H-NMR of PF127 derivatives .....                                    | pS4 |
| Figure S7. FT-IR spectra of PF127 derivatives .....                                            | pS5 |
| Figure S8. <sup>1</sup> H-NMR of polymer-(peptide <sup>2+</sup> ) <sub>2</sub> , details ..... | pS5 |
| Figure S9-S15. DLS, Zeta Potential, TEM analyses of NPs-peptides .....                         | pS6 |

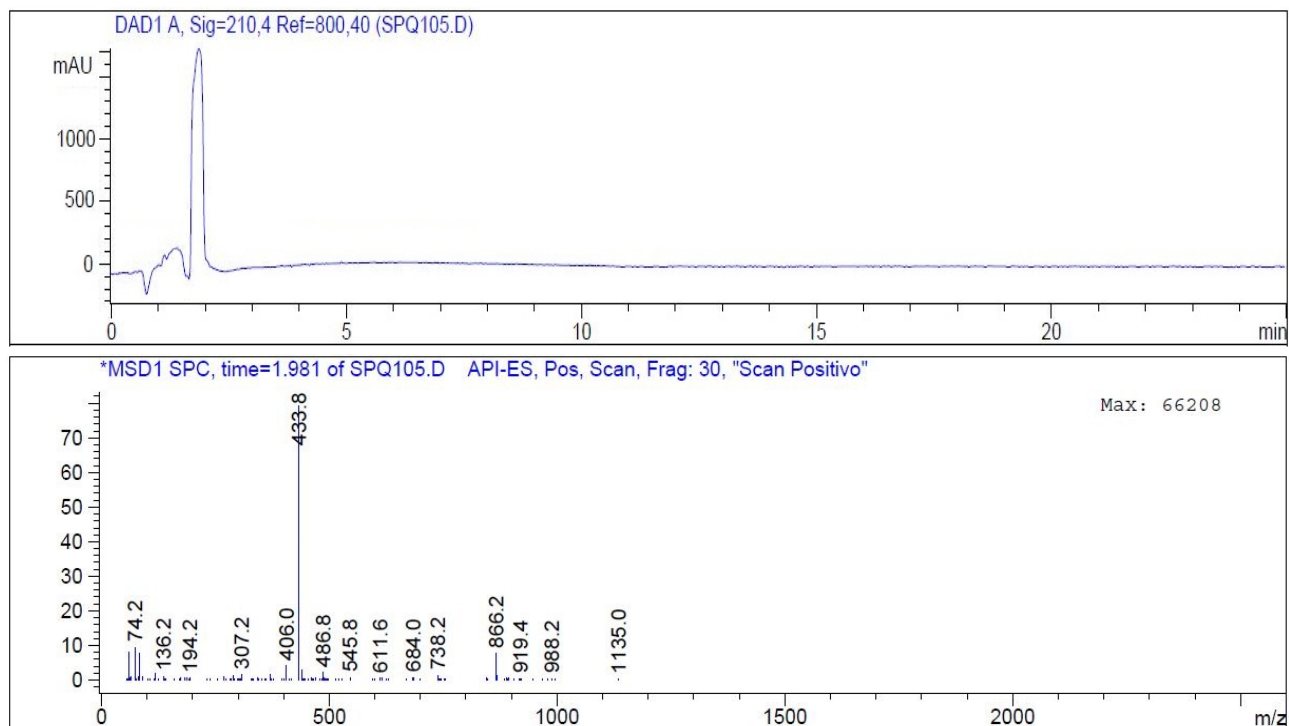

**Figure S1.** RP HPLC and ESI MS of peptide<sup>2+</sup>.

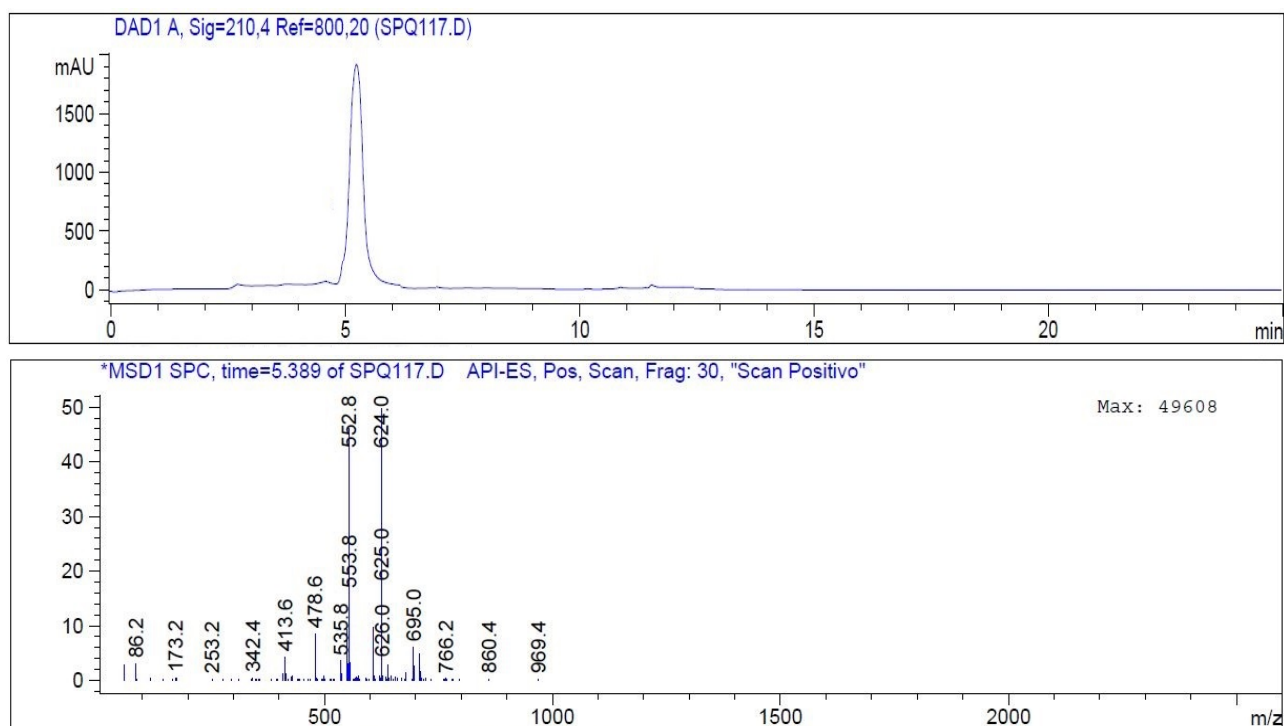

**Figure S2.** RP HPLC and ESI MS of peptide<sup>0</sup>.

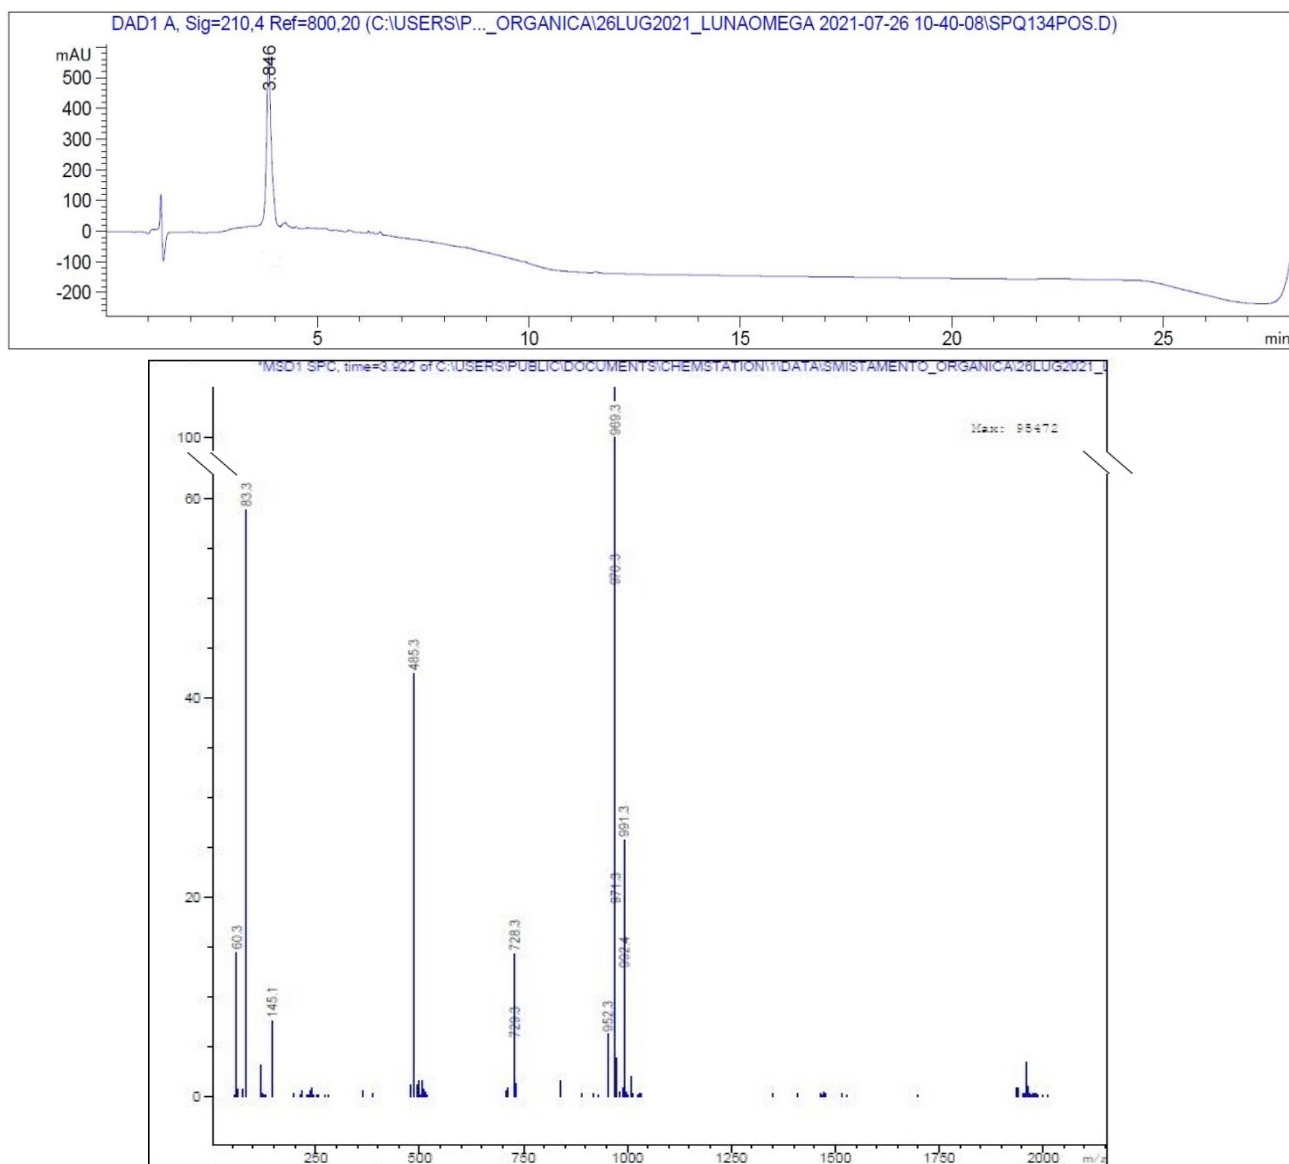

**Figure S3.** RP HPLC and ESI MS of peptide<sup>2-</sup>.

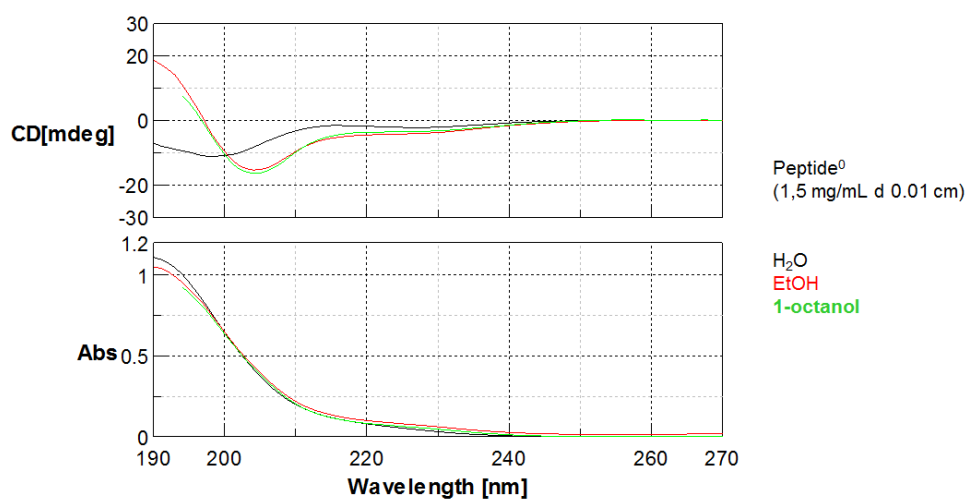

**Figure S4.** Circular dichroism spectra of peptide<sup>2+</sup> (1.5 mg/mL d 0.01cm) in H<sub>2</sub>O (black), EtOH (red), EtOH/1-octanol 1:1 (green), EtOH/1-octanol 1:2 (blue)

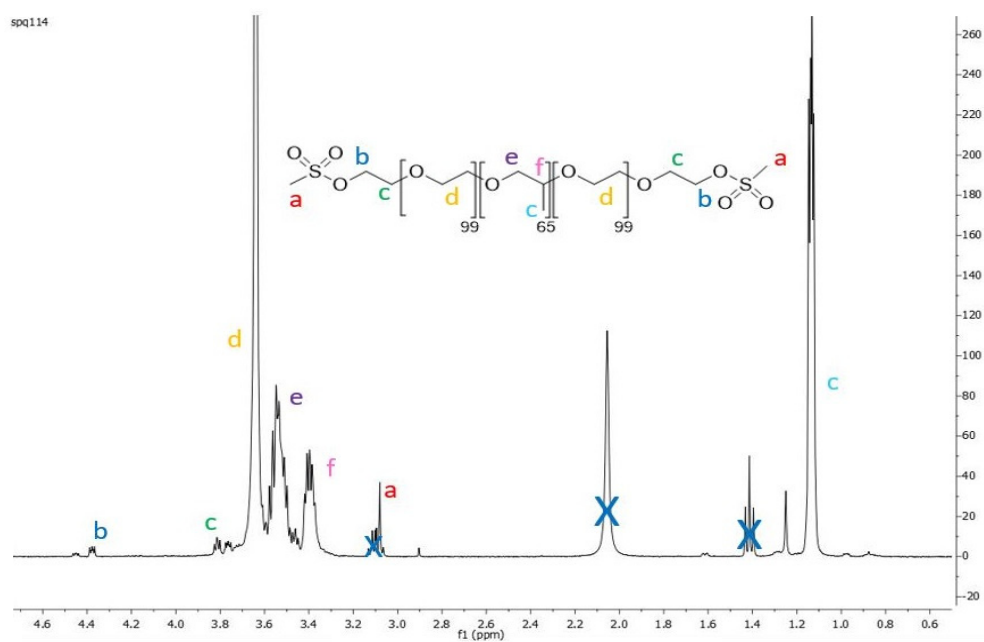

**Figure S5.**  $^1\text{H}$ -NMR of dimesylated PF127, 400 MHz in  $\text{CDCl}_3$ .

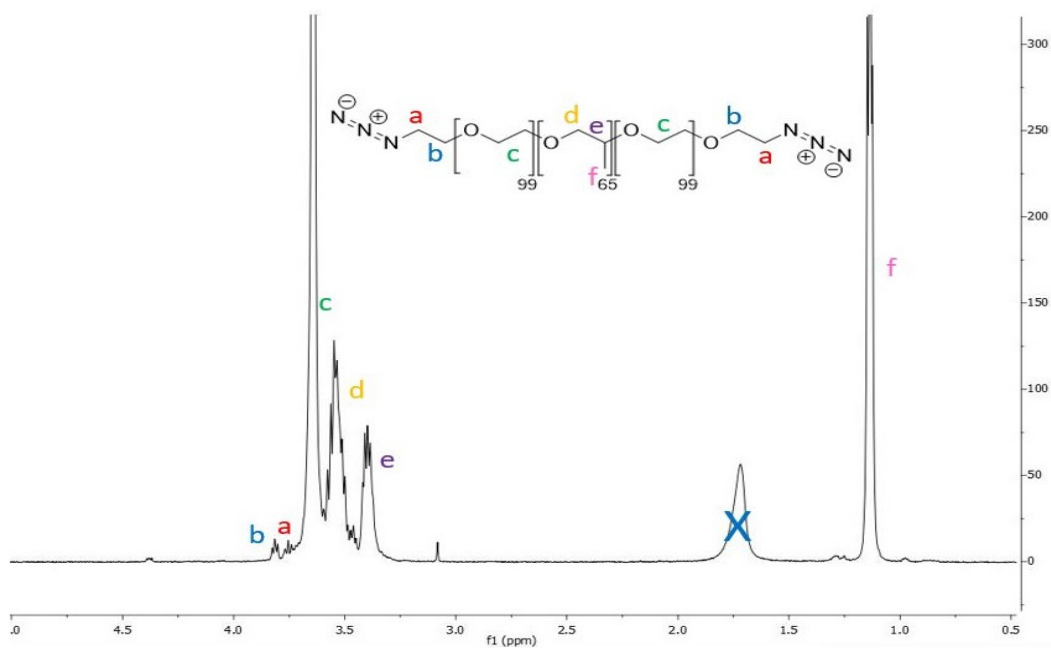

**Figure S6.**  $^1\text{H}$ -NMR of the diazide derivative of PF127, 400 MHz in  $\text{CDCl}_3$ .

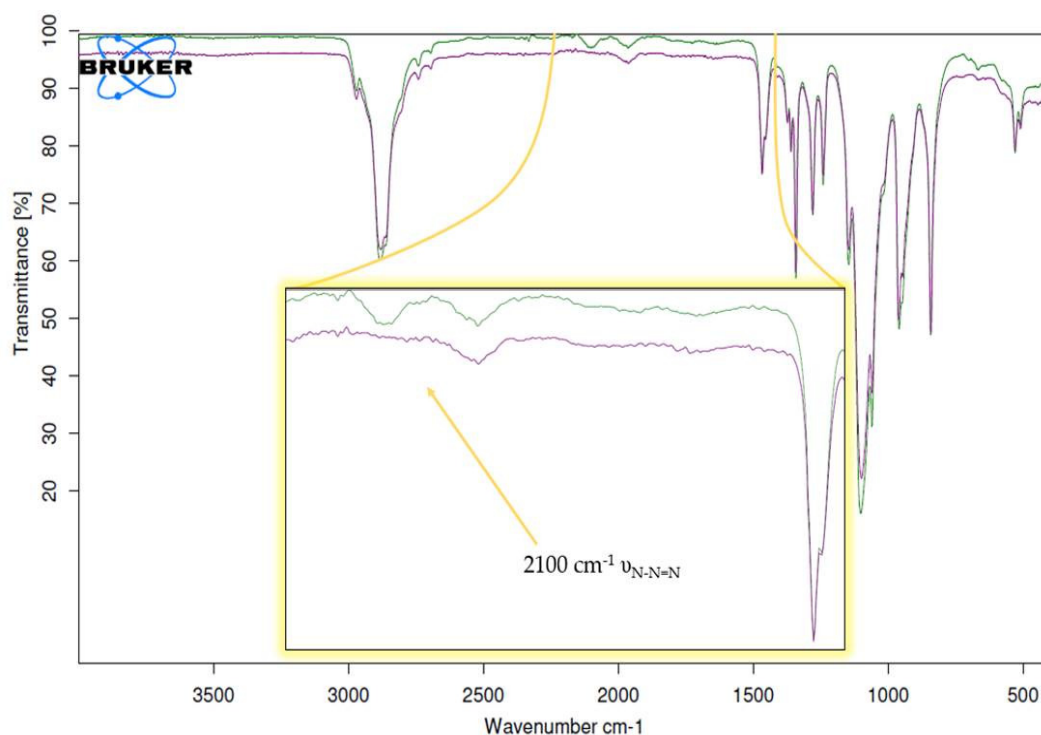

**Figure S7.** Superimposed FT-IR spectra of diazide derivative of PF127 (green) and PF127 (purple), with magnification in the area of interest around 2100 cm<sup>-1</sup>.

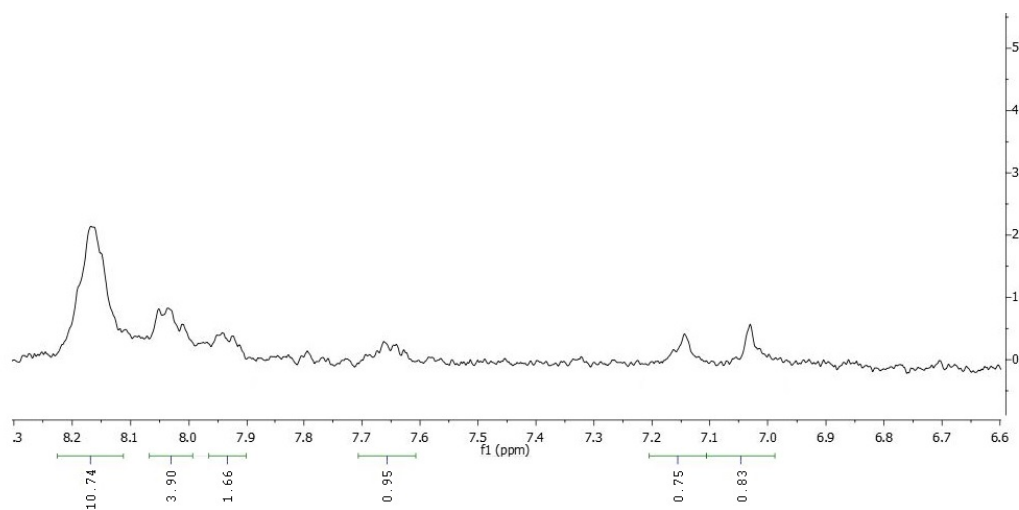

**Figure S8.** <sup>1</sup>H-NMR spectra of the amide region of polymer-(peptide<sup>2+</sup>)<sub>2</sub> with integrals, 400MHz, DMSO-d<sub>6</sub>; the integral of the reference peak of PPO methyls at 0.8 ÷ 1.1 ppm was set at 195 protons.

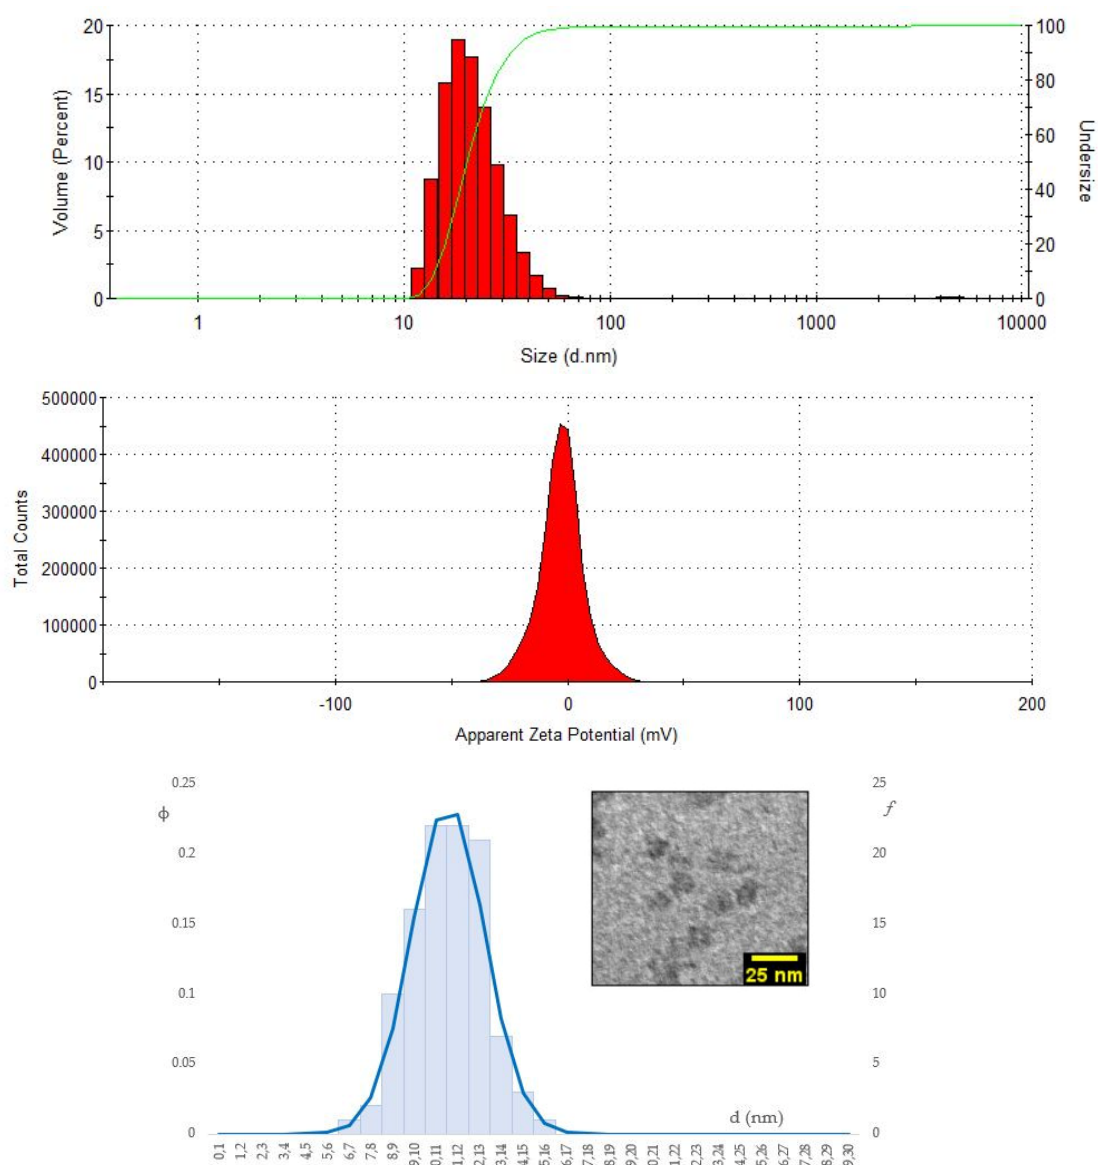

**Figure S9.** Top, DLS hydrodynamic size distribution by volume of NPs-10%peptide<sup>2+</sup>; middle, Zeta Potential distribution of NPs-10%peptide<sup>2+</sup>; bottom, TEM size distribution with representative image of NPs-10%peptide<sup>2+</sup> (scale bar 25 nm).

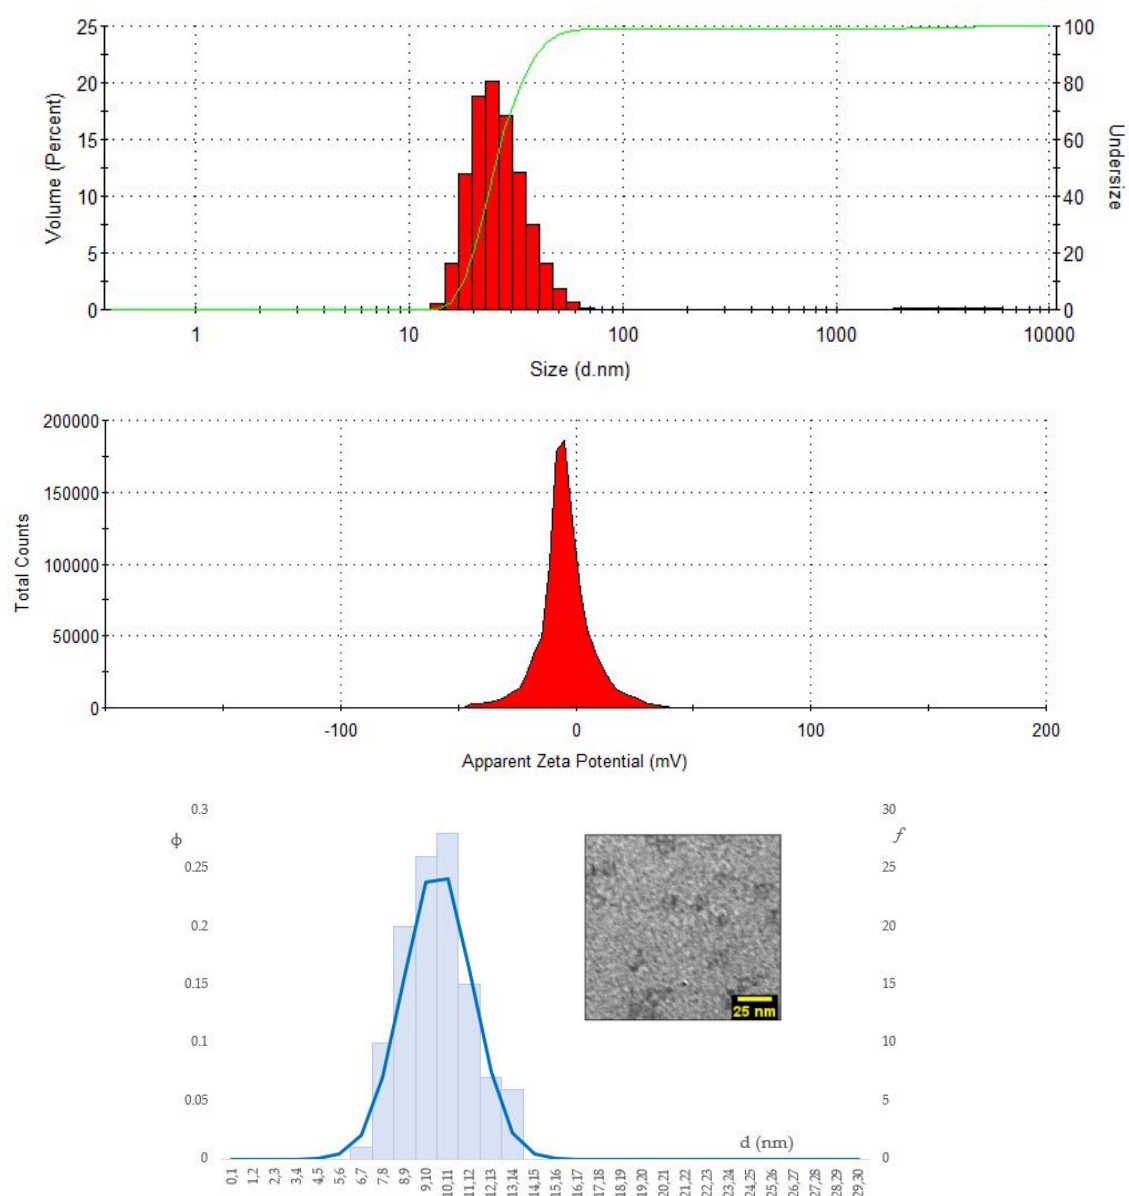

**Figure S10.** Top, DLS hydrodynamic size distribution by volume of NPs-20%peptide<sup>2+</sup>; middle, Zeta Potential distribution of NPs-20%peptide<sup>2+</sup>; bottom, TEM size distribution with representative image of NPs-20%peptide<sup>2+</sup> (scale bar 25 nm).

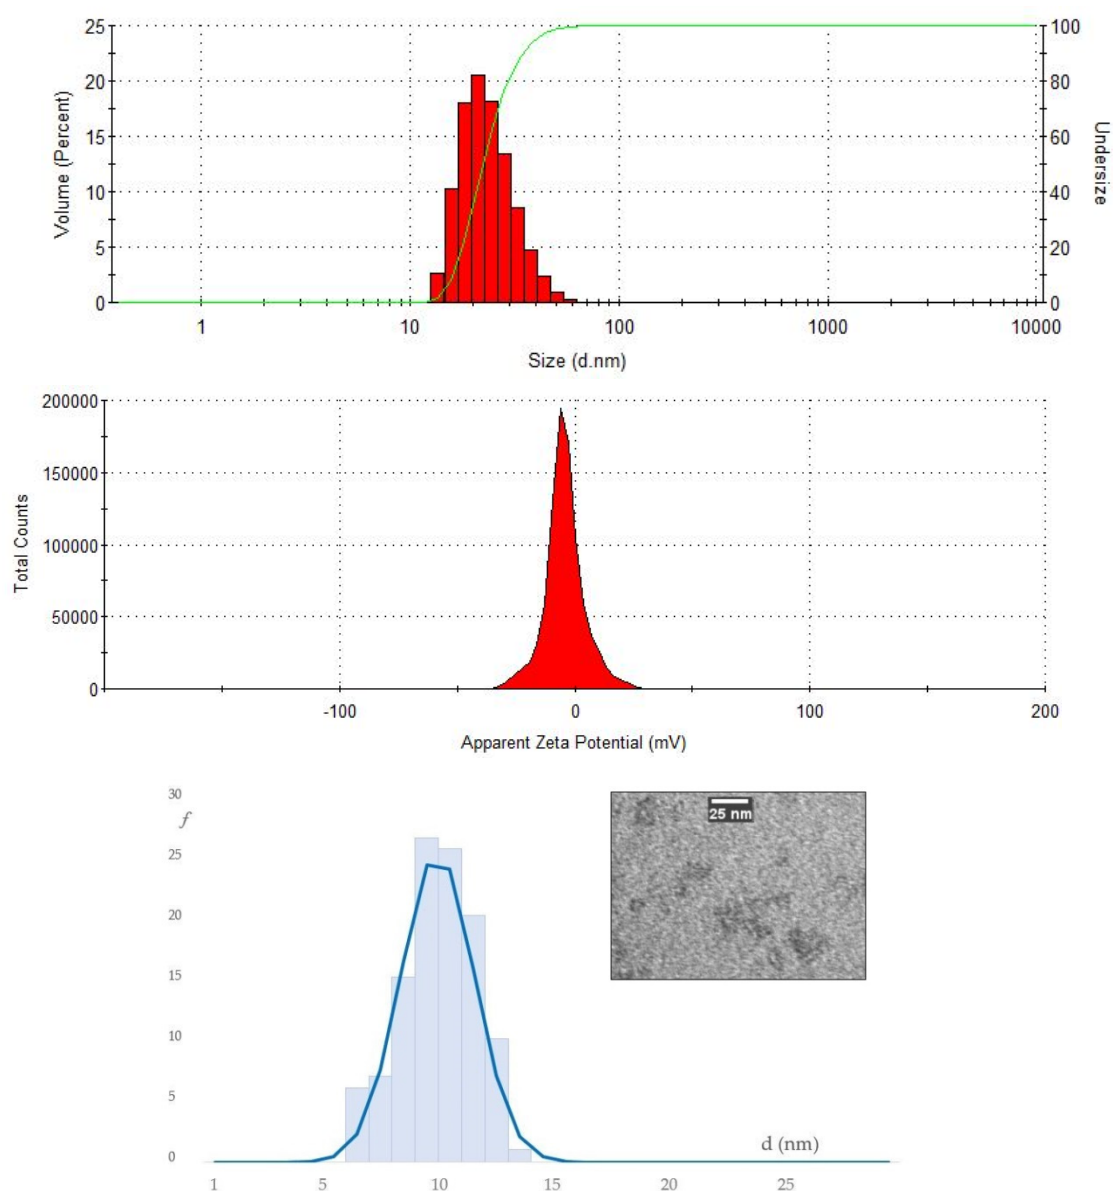

**Figure S11.** Top, DLS hydrodynamic size distribution by volume of NPs-10%peptide<sup>0</sup>; middle, Zeta Potential distribution of NPs-10%peptide<sup>0</sup>; bottom, TEM size distribution with representative image of NPs-10%peptide<sup>0</sup> (scale bar 25 nm).

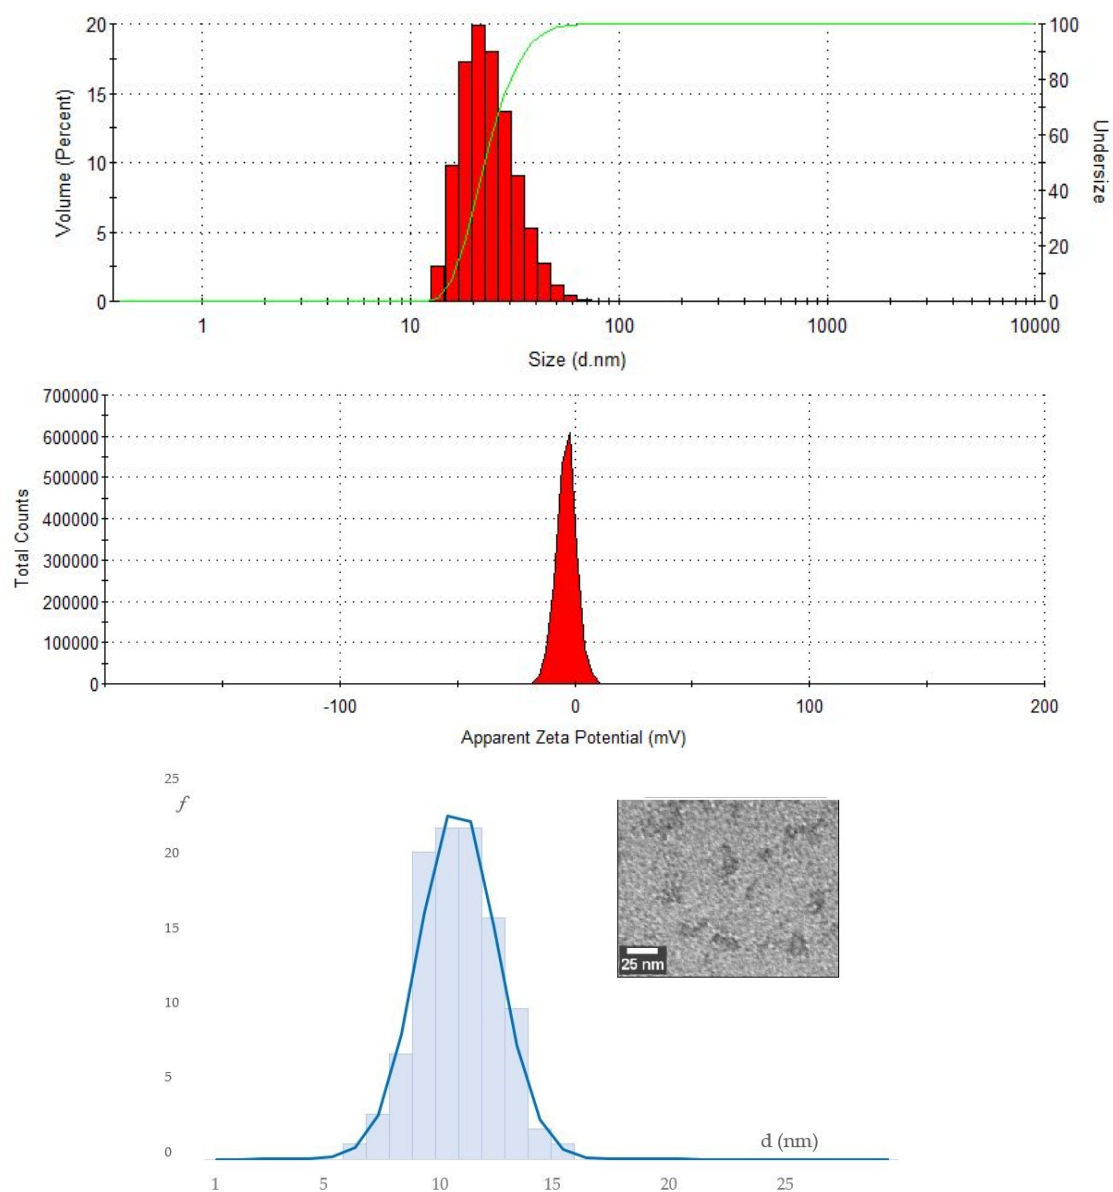

**Figure S12.** Top, DLS hydrodynamic size distribution by volume of NPs-20%peptide<sup>0</sup>; middle, Zeta Potential distribution of NPs-20%peptide<sup>0</sup>; bottom, TEM size distribution with representative image of NPs-20%peptide<sup>0</sup> (scale bar 25 nm).

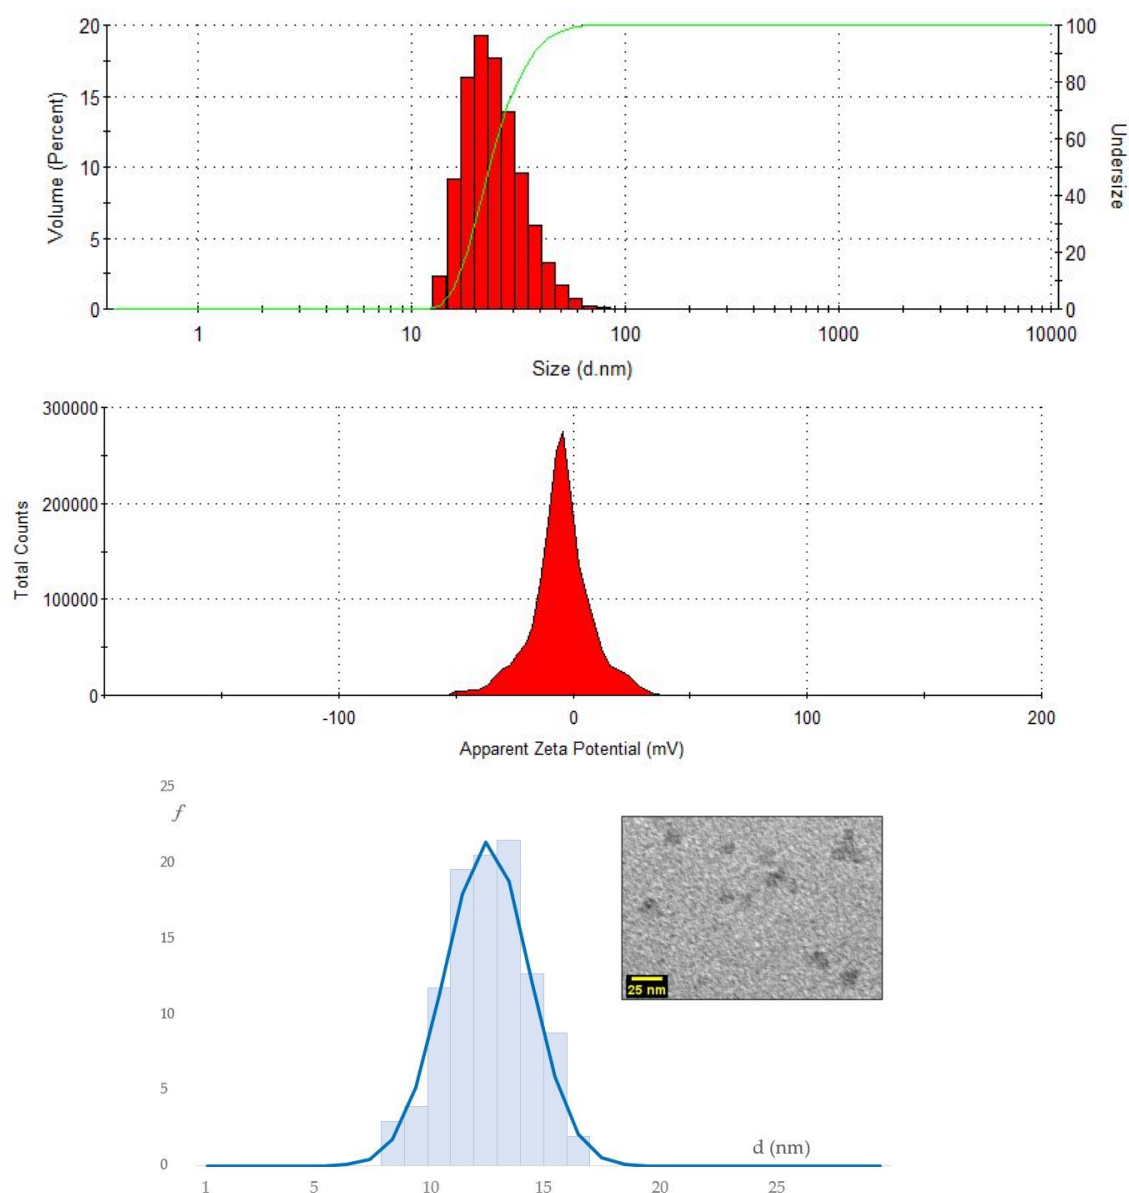

**Figure S13.** Top, DLS hydrodynamic size distribution by volume of NPs-30%peptide<sup>0</sup>; middle, Zeta Potential distribution of NPs-30%peptide<sup>0</sup>; bottom, TEM size distribution with representative image of NPs-30%peptide<sup>0</sup> (scale bar 25 nm).

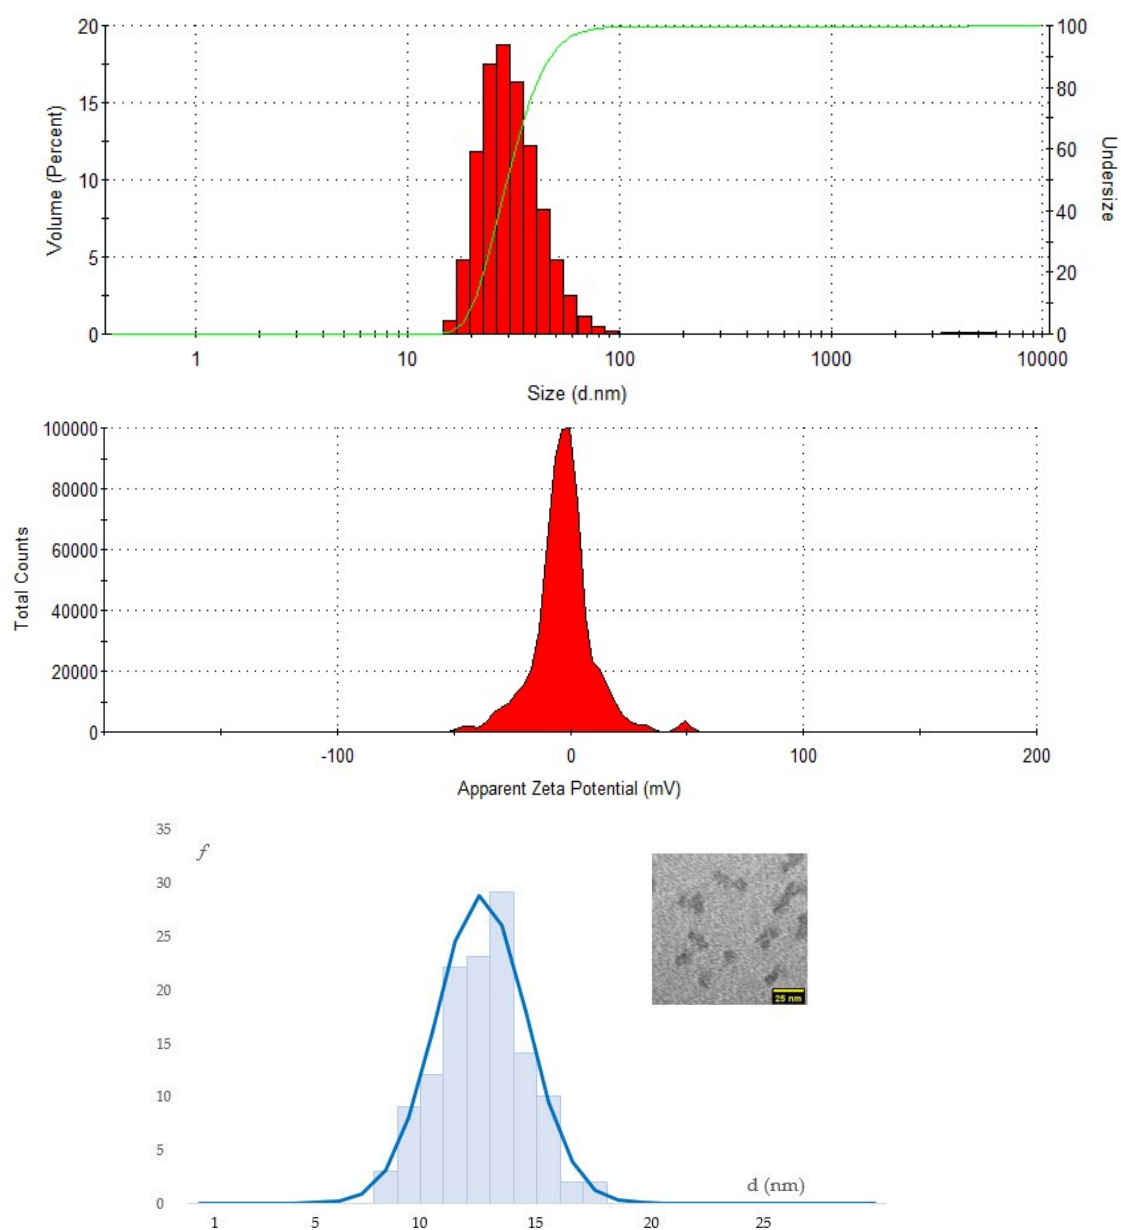

**Figure S14.** Top, DLS hydrodynamic size distribution by volume of blend NPs-30% peptide; middle, Zeta Potential distribution of blend NPs-30% peptide; bottom, TEM size distribution with representative image of blend NPs-30% peptide (scale bar 25 nm).

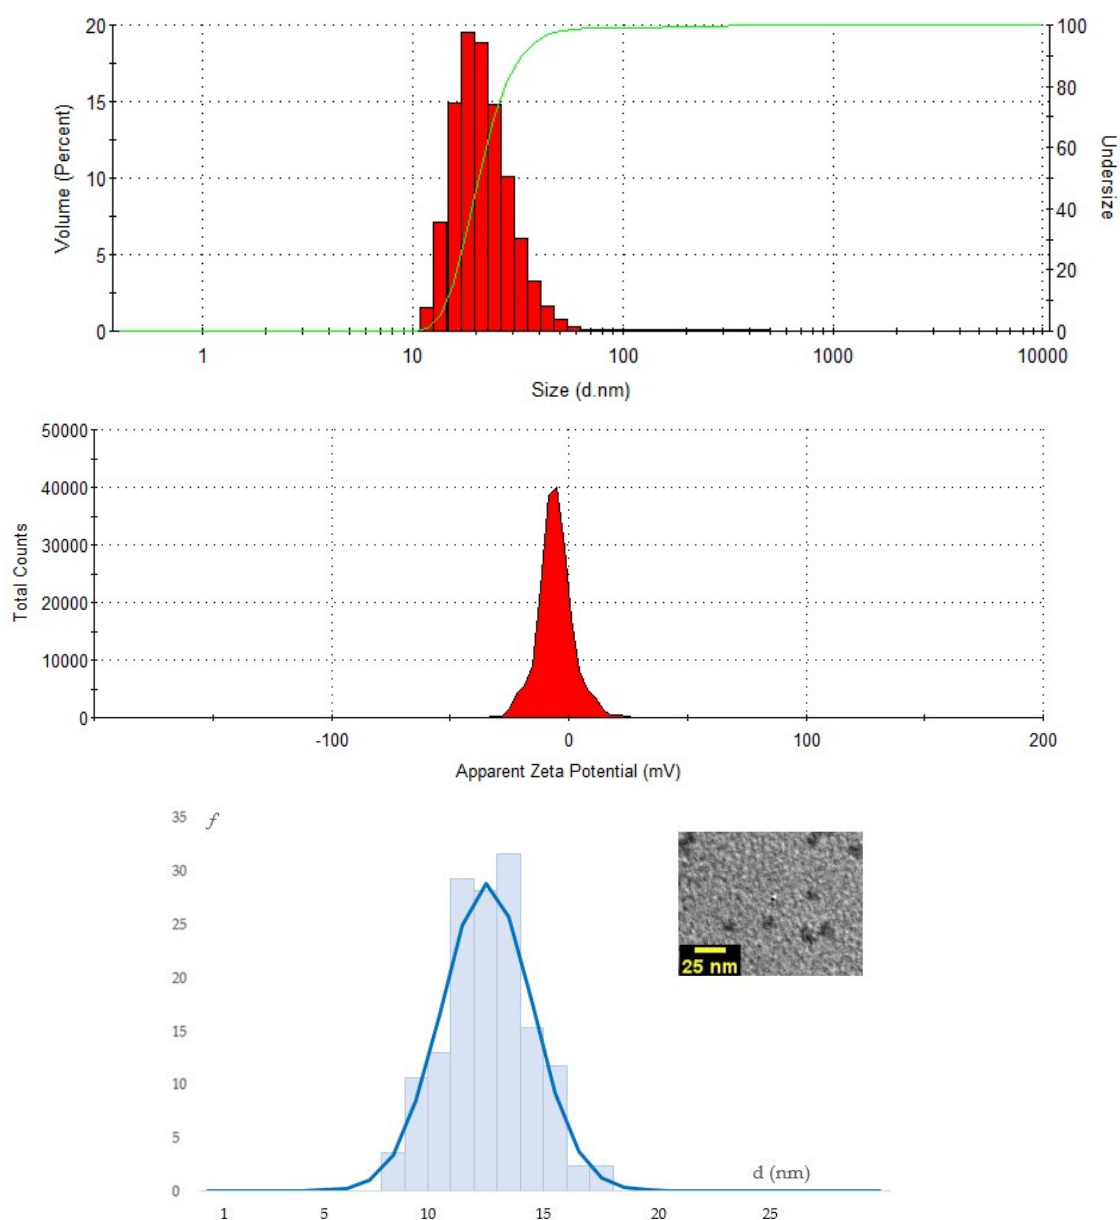

**Figure S15.** Top, DLS hydrodynamic size distribution by volume of mixed NPs-30% peptide; middle, Zeta Potential distribution of mixed NPs-30% peptide; bottom, TEM size distribution with representative image of mixed NPs-30% peptide (scale bar 25 nm).
